# Supplementary material for: Synthesis and characterization of protective silica reinforced hybrid poly(vinylpyrrolidone)/acrylate/silane nanocomposite coatings
Source: Royal Society of Chemistry journal article supplement (doi:10.1039/c9nj04835a), 2019-12-09
Supplement: c9nj04835a1.pdf [file c9nj04835a1.pdf]

**Synthesis and characterization of protective silica reinforced hybrid  
poly(vinylpyrrolidone)/acrylate/silane nanocomposite coatings**

Ubong Eduok<sup>a,\*</sup>, Omar Faye<sup>a</sup>, Enyinnaya Ohaeri<sup>a</sup>, Jerzy Szpunar<sup>a</sup>, Inemesit Akpan<sup>b</sup>

*a. Department of Mechanical Engineering, College of Engineering, University of Saskatchewan, 57  
Campus Drive, Saskatoon, S7N 5A9, Saskatchewan, Canada.*

*b. Department of Chemistry, Faculty of Science, University of Uyo, P.M.B. 1017, Uyo, Nigeria.*

**SUPPORTING INFORMATION**

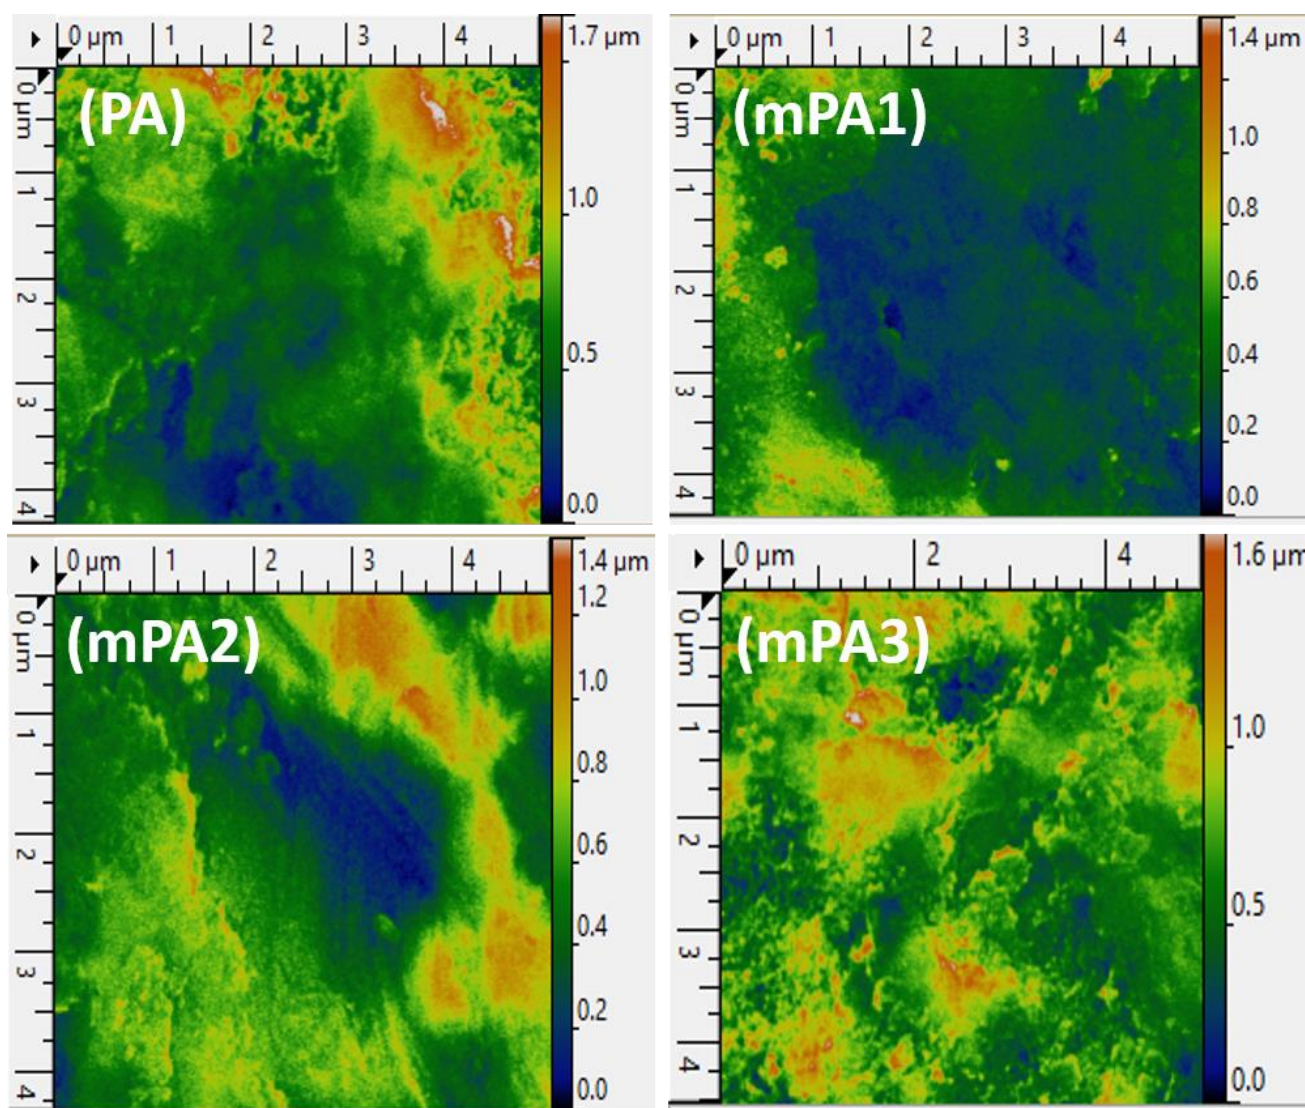

Fig. S1. 2D AFM micrograph unmodified (PA) and SiO<sub>2</sub>NP-modified (mPA1-3) polymer coated surfaces.

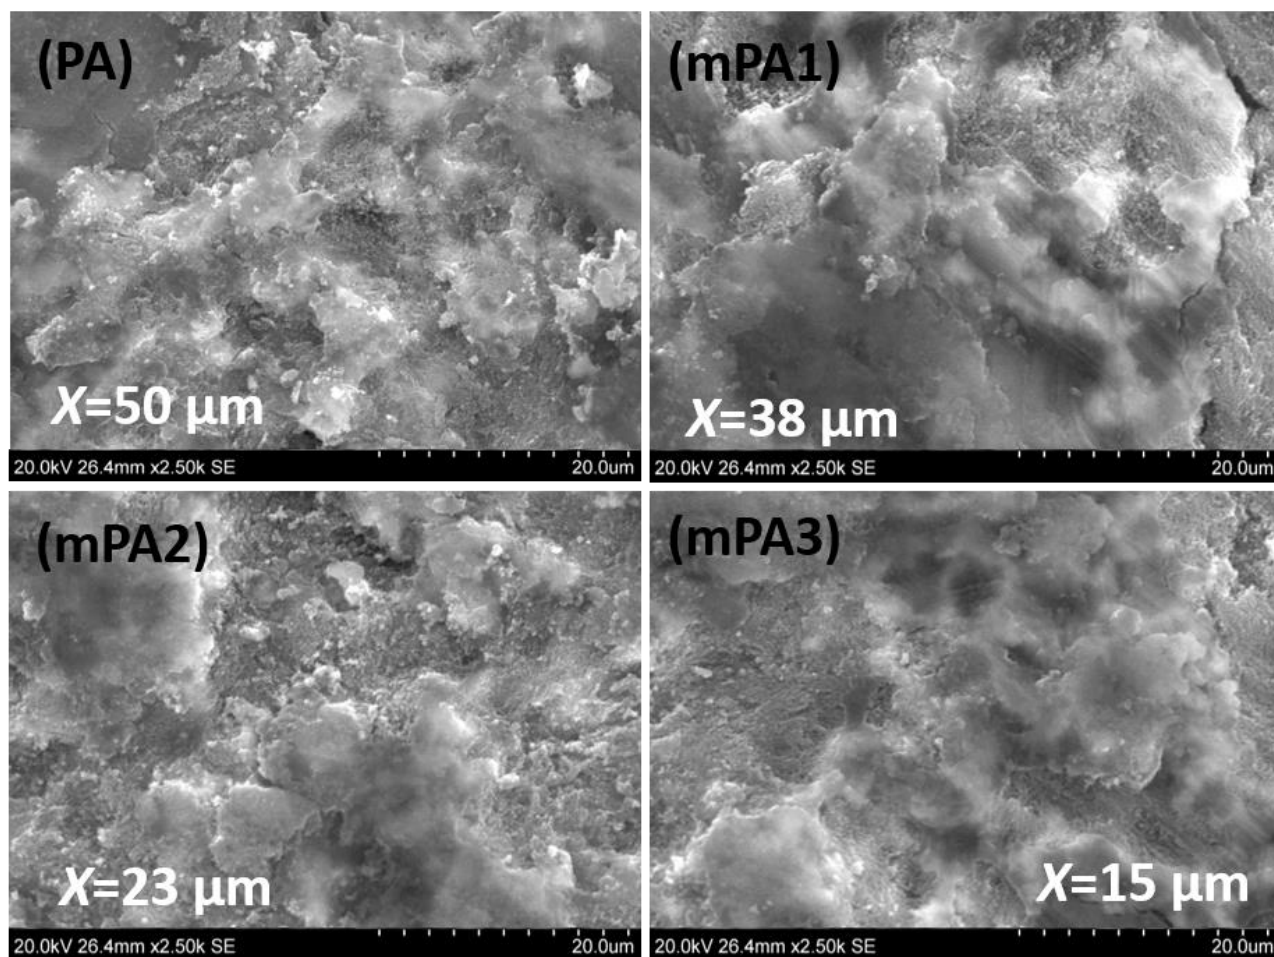

Fig. S2. The SEM surface appearances of unmodified (PA) and SiO<sub>2</sub>NP-modified (mPA1-3) hybrid poly(vinylpyrrolidone)/acrylate/silane coated surfaces on steel before exposure to saline 3.5 wt.% NaCl electrolytes; Coating thickness =  $X$  (measured in  $\mu\text{m}$ ).

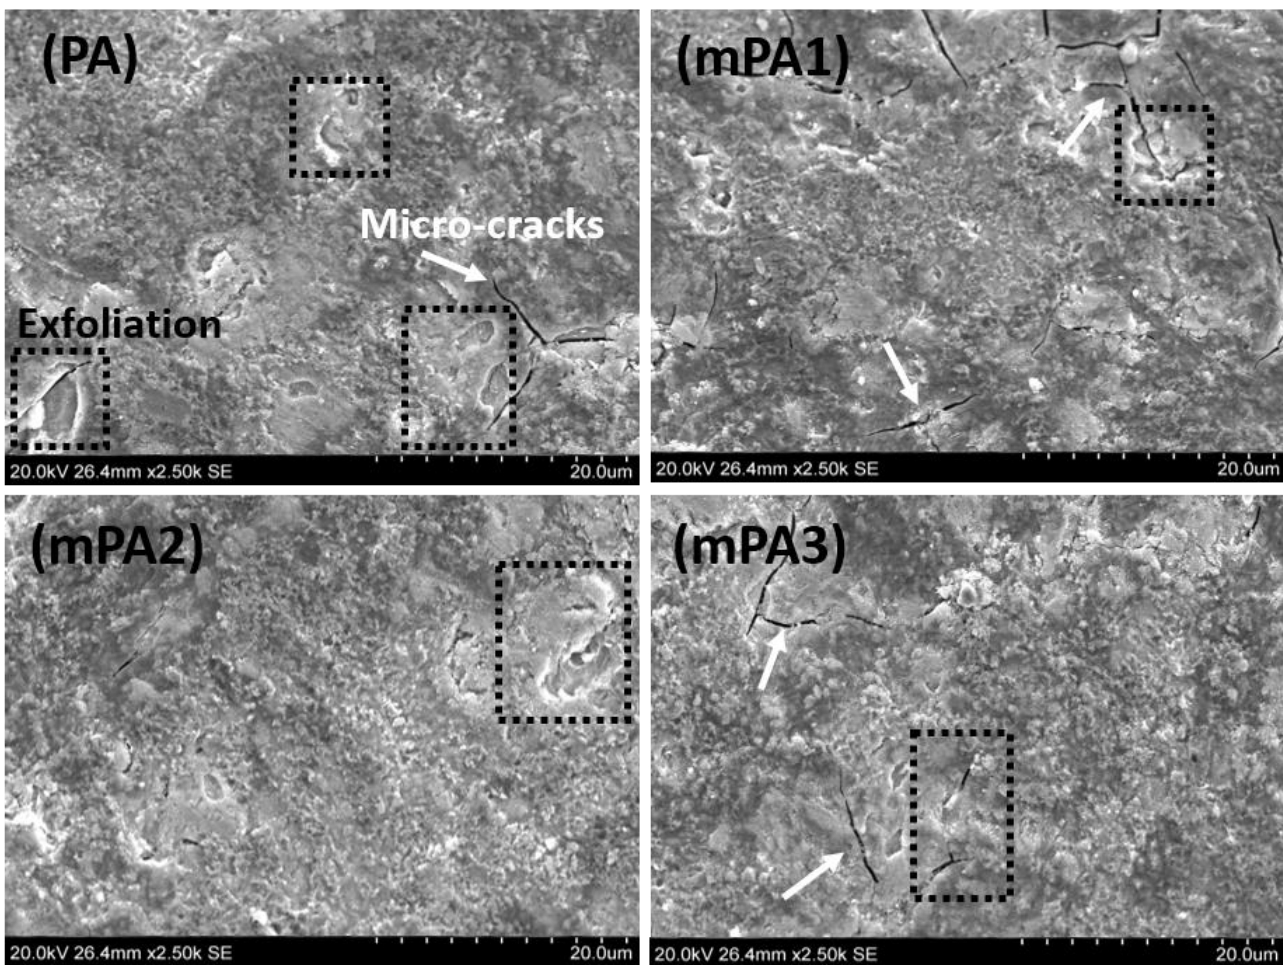

Fig. S3. The SEM surface appearances of unmodified (PA) and SiO<sub>2</sub>NP-modified (mPA1-3) hybrid poly(vinylpyrrolidone)/acrylate/silane coated surfaces on steel after a week exposure to saline 3.5 wt.% NaCl electrolytes.
